# Supplementary material for: Hemin-activated macrophages home to the pancreas and protect from acute pancreatitis via heme oxygenase-1 induction
Source: JCI journal article supplement (doi:10.1172/jci24912), 2005-10-26
Supplement: sd1 [file 1]

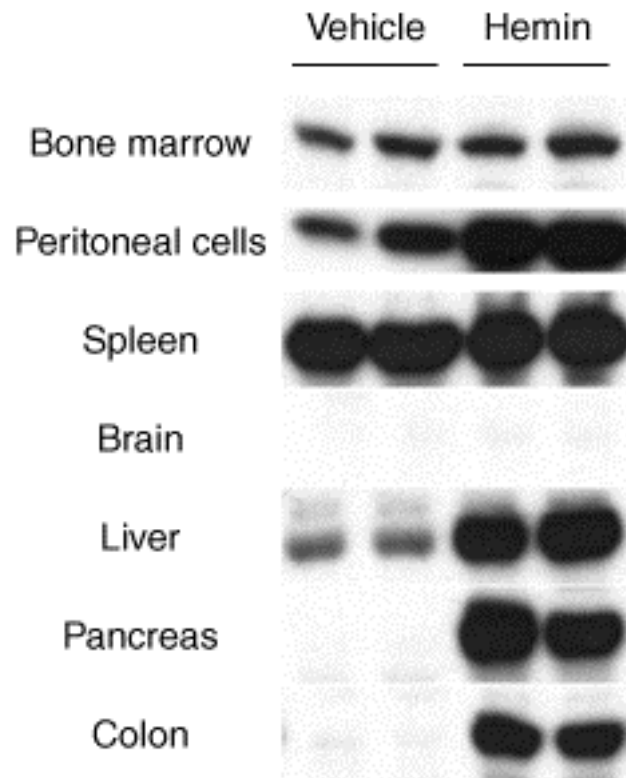

**Supplemental Fig. 1: HO-1 expression and hemin-mediated induction in mouse tissues and cells.** Mice were injected 3x during 7d with vehicle or hemin (2 mice/group) followed by harvesting of the indicated organs and cells then preparation of total tissue/cell homogenates. Protein concentrations of the homogenates were measured followed by SDS-PAGE separation (40  $\mu$ g of protein/lane) then blotting using anti-HO-1 antibodies. Note the induction of HO-1 in peritoneal cells, liver, pancreas and colon (most prominent change being in pancreas) but not in bone marrow, spleen or brain. HO-2 levels did not change after hemin administration in any of the tissues (not shown).

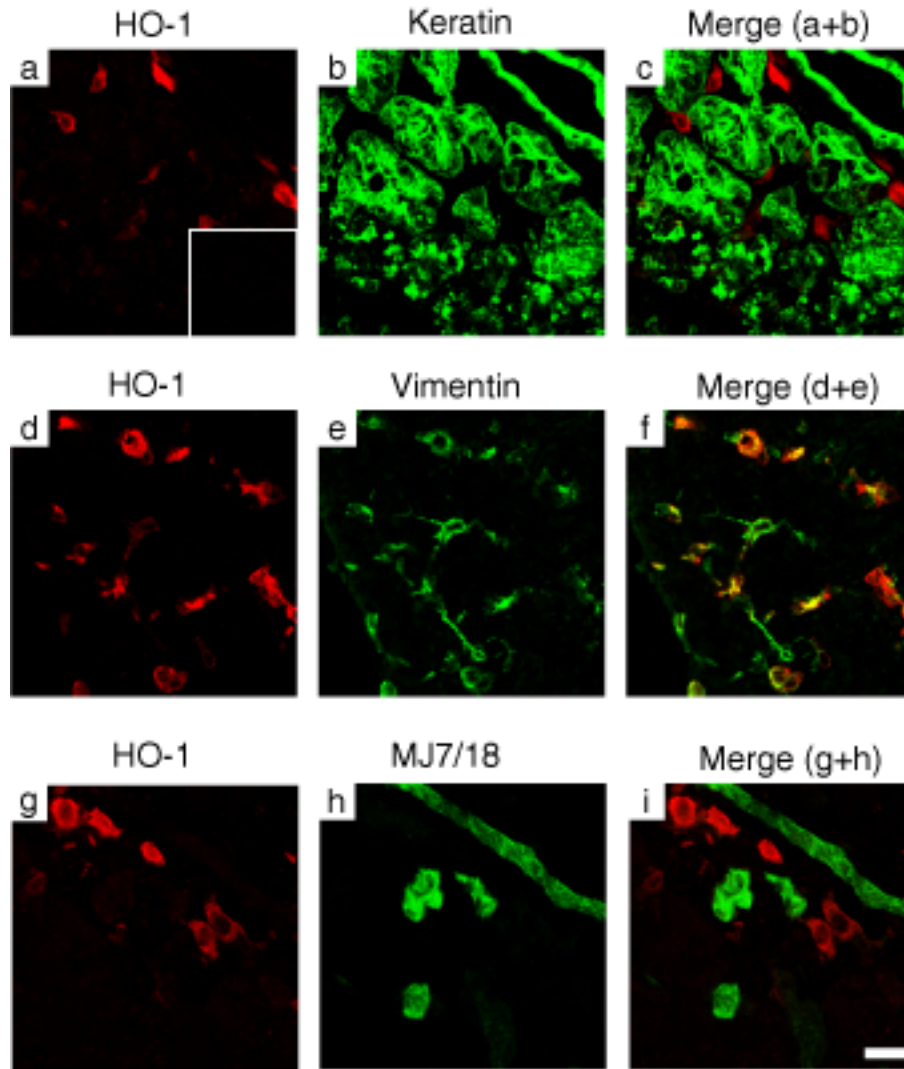

**Supplemental Fig. 2: Hemin induction of pancreatic HO-1 occurs in non-epithelial cells of mice fed CDD.** Pancreata of mice pretreated with hemin followed by 3 days of CDD feeding were isolated, sectioned, then double-stained using antibodies to HO-1 (a, d and g) and keratin polypeptide 8 (epithelial marker, b), vimentin (mesenchymal marker, e) or MJ7/18 (endothelial marker, h). Merging of the indicated images is shown in the right panels. Scale bar in panel i = 20  $\mu$ m. HO-1 staining of pancreas from mice treated with vehicle alone (without CDD) afforded background staining (inset of panel a).

|                                             | <u>Vehicle treated</u>    | <u>Hemin treated</u>      | <u>p-value</u> |
|---------------------------------------------|---------------------------|---------------------------|----------------|
| Total cell number                           | $3.1 \pm 1.0 \times 10^6$ | $7.3 \pm 2.1 \times 10^6$ | 0.06           |
| % Mac-1 <sup>+</sup> and F4/80 <sup>+</sup> | $14.7 \pm 2.5\%$          | $26.6 \pm 3.5\%$          | 0.02           |

**Supplemental Table 1: Effect of hemin or vehicle on peritoneal cell number.** Mice (3 per group) were injected with vehicle or hemin during a 7-day period. Peritoneal cells were then isolated followed by counting. Cell viability was greater than 98% using trypan blue exclusion. The number of cells that were double positive for Mac-1<sup>+</sup> and F4/80<sup>+</sup> was then determined using flow cytometry. P-values compare the hemin treated versus the vehicle treated groups.
